# Supplementary material
Source: PubMed Central journal article supplement (PMC10973750)

**SUPPLEMENTARY FIGURES**

**Supplementary Figure 1. Outcomes of patients according to the best radiological assessment (A) Confirmed Progression free-survival (PFS) et (B) Overall survival (OS).**

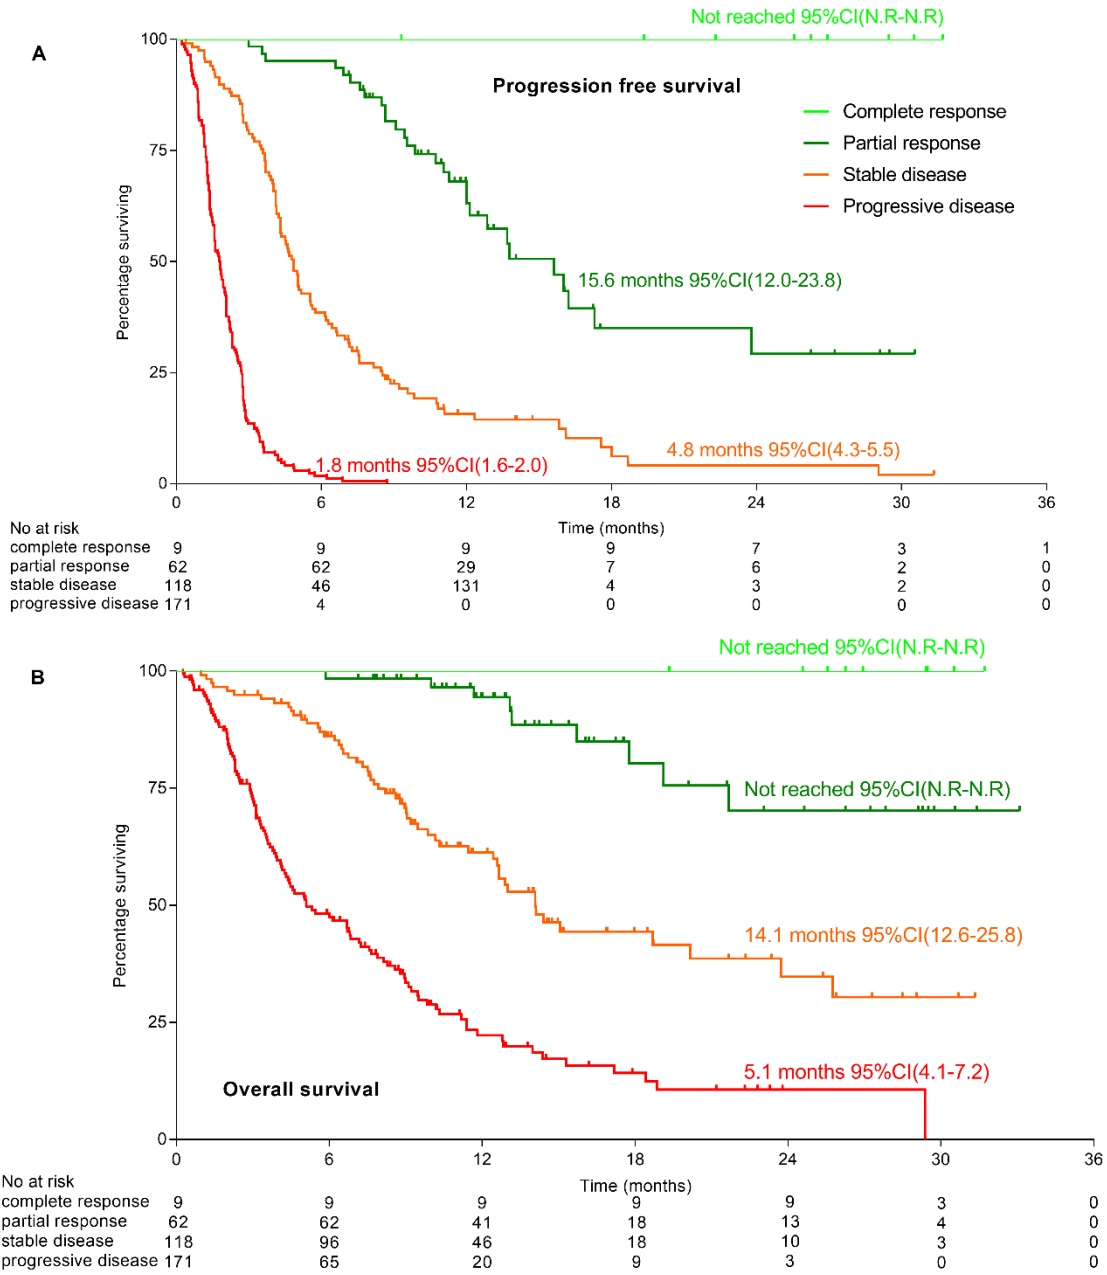

**Supplementary Figure 2. Overall survival of patients achieving stable disease (A) and complete or partial response (B) according to prognostic scores.**

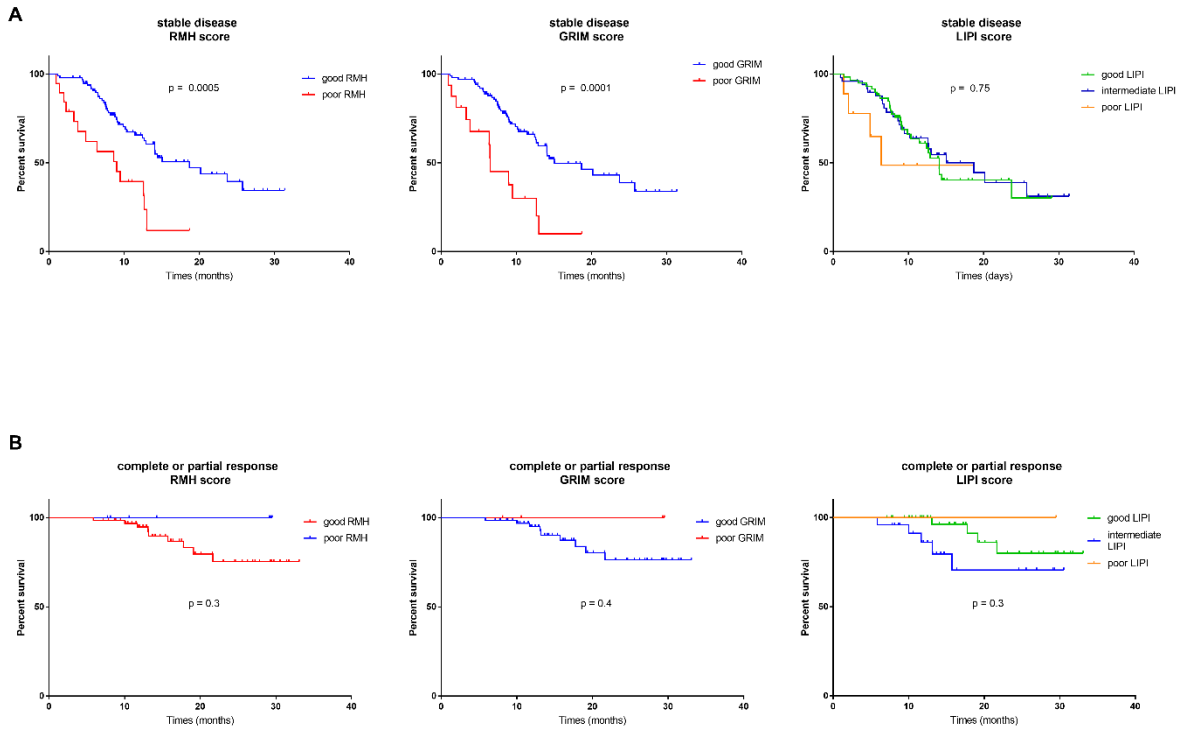

**Supplementary Figure 3. Examples of imaging of patients who experienced atypical response:** (A) Pseudoprogession of mediastinal lymph nodes and a pleural lesion achieving partial response; (B) pseudoprogession of peritoneal carcinomatosis achieving stable disease; (C) dissociated response with pleural response and peritoneal carcinomatosis progression.

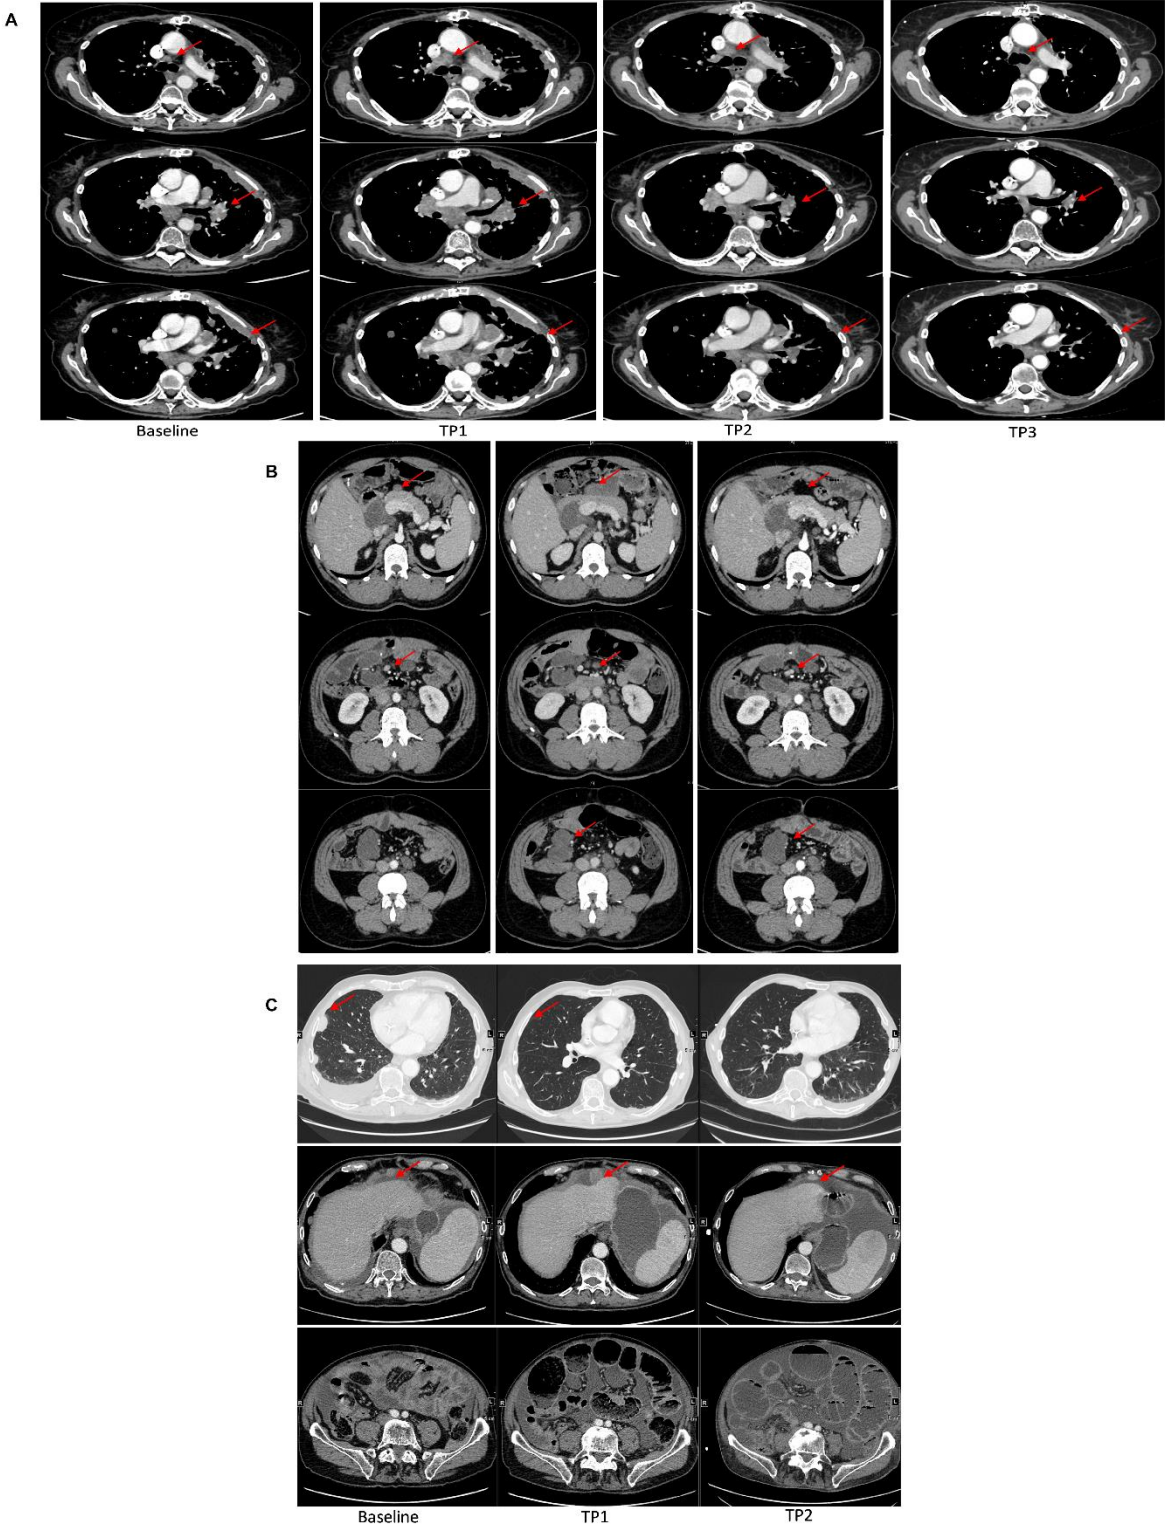

**Supplementary Figure 4. (A) Progression free-survival (PFS) and (B) Overall survival (OS) according to radiological response (pseudoprogression and dissociated response)**

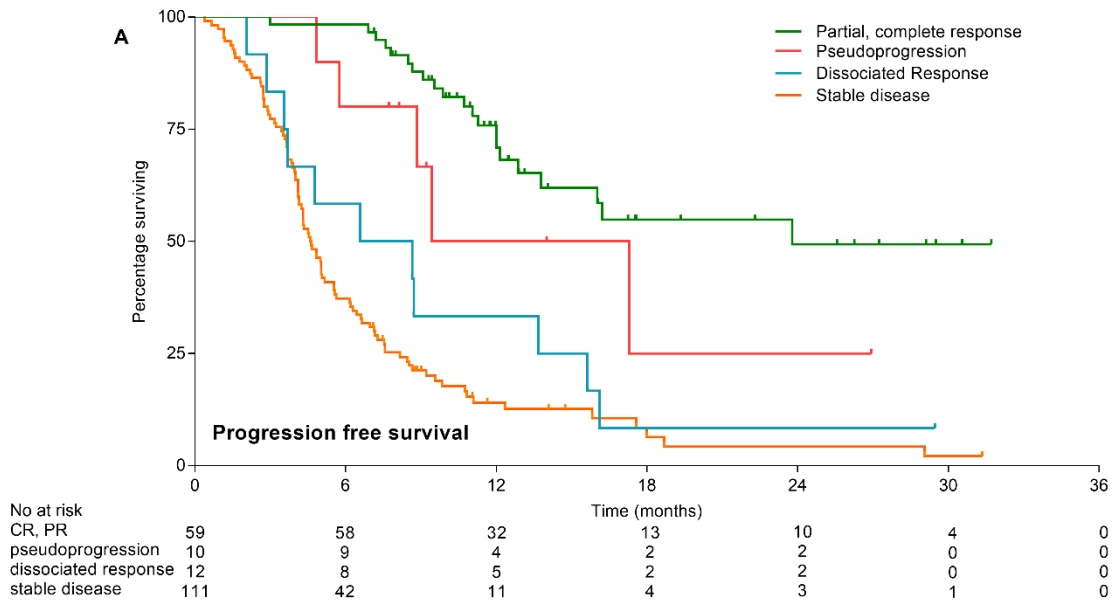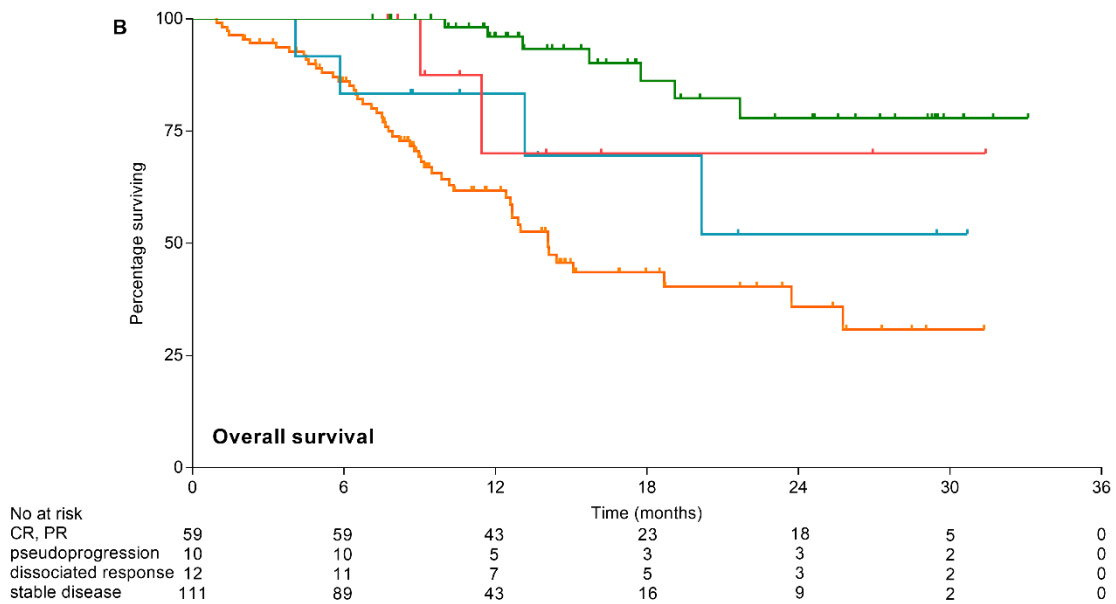

Supplement: 262_2020_2647_MOESM1_ESM.pdf [file 262_2020_2647_MOESM1_ESM.pdf]
