# Supplementary material
Source: PubMed Central journal article supplement (PMC10973750)
Supplement: 262_2020_2647_MOESM2_ESM.pdf [file 262_2020_2647_MOESM2_ESM.pdf]

## Supplementary Methods

The RMH score(13), based on pretreatment number of metastatic sites, lactate dehydrogenase (LDH) and serum albumin, was validated in patients treated with cytotoxic and targeted therapies in phase I trials. The GRIm-Score(14) is validated in IO phase I trials and is based on albumin, LDH and neutrophil-to-lymphocyte ratio (NLR). LIPI score(15) is based on pretreatment derived neutrophils/(leukocytes minus neutrophils) ratio (dNLR) and lactate dehydrogenase (LDH). The LIPI is a prognostic score in NSCLC patients treated for immune checkpoint inhibitors.

| <b>RMH score</b>                                         | <b>GRIm score</b>                                        | <b>LIPI score</b>                                                                  |
|----------------------------------------------------------|----------------------------------------------------------|------------------------------------------------------------------------------------|
| Number of metastatic sites >2 (+1)                       | NLR ( <i>neutrophils-to-lymphocytes</i> ) > 6 (+1)       | dNLR ( <i>neutrophils/(leukocytes minus neutrophils)</i> ) > 3 (+1)                |
| LDH > UNL (+1)                                           | LDH > UNL (+1)                                           | LDH > UNL (+1)                                                                     |
| Albumin < 35 g.l <sup>-1</sup> (+1)                      | Albumin < 35 g.l <sup>-1</sup> (+1)                      |                                                                                    |
| → low risk (0 - 1 factor)<br>→ high risk (2 - 3 factors) | → low risk (0 - 1 factor)<br>→ high risk (2 - 3 factors) | → low risk (0 factor)<br>→ intermediate risk (1 factor)<br>→ high risk (2 factors) |

UNL: upper limit normal.
