# Supplementary material
Source: PubMed Central journal article supplement (PMC10973750)
Supplement: 262_2020_2647_MOESM3_ESM.pdf [file 262_2020_2647_MOESM3_ESM.pdf]

## SUPPLEMENTARY TABLES

**Supplementary Table 1. Type of immune-oncology (IO) antibodies (mAb) therapy**

|                                      | No (%)                |
|--------------------------------------|-----------------------|
|                                      | All patients<br>n=360 |
| <b>Monotherapy</b>                   | <b>92 (26%)</b>       |
| Anti PD-1                            | 32 (9%)               |
| Anti PDL-1                           | 30 (8.5%)             |
| Others                               | 30 (8.5%)             |
| <b>Combination</b>                   | <b>268 (74%)</b>      |
| Anti PDL-1 + Radiotherapy            | <b>35 (10%)</b>       |
| Anti PD-1 + Targeted therapy non ICT | 72 (20%)              |
| Anti PD-1/Anti-PDL-1 + ICT           | 161 (45%)             |

**Supplementary Table 2. Percentage of fast progression, pseudoprogession and dissociated response according to tumor histology.**

| Histology                  | No (%)        |             |             |
|----------------------------|---------------|-------------|-------------|
|                            | FastPD (n=45) | PsPD (n=10) | DisR (n=12) |
| Adnexial carcinoma         | 0             | 0           | 0           |
| Urothelial                 | 10 (21%)      | 2 (4%)      | 2 (4%)      |
| Breast                     | 3 (12%)       | 0           | 0           |
| Ileum                      | 0             | 0           | 0           |
| Cavum                      | 2 (20%)       | 0           | 0           |
| Cervix                     | 0             | 1 (5%)      | 2 (10%)     |
| Cholangiocarcinoma         | 1 (33%)       | 0           | 0           |
| Colorectal                 | 7 (14%)       | 1 (2%)      | 1 (2%)      |
| <i>Colorectal MSS</i>      | 7 (18%)       | 0           | 1 (3%)      |
| <i>Colorectal MSI-high</i> | 0             | 1 (10%)     | 0           |
| Gastric, Oesophagus        | 4 (21%)       | 0           | 0           |
| Hepatocarcinoma            | 2 (14%)       | 1 (7%)      | 0           |
| Head and neck              | 3 (13%)       | 0           | 0           |
| Renal                      | 0             | 2 (7%)      | 1 (3%)      |
| NSCLC                      | 4 (8%)        | 1 (2%)      | 2 (4%)      |
| Merkel carcinoma           | 0             | 0           | 0           |
| Ovarian                    | 2 (22%)       | 0           | 1 (11%)     |
| Pancreas                   | 2 (14%)       | 0           | 0           |
| Penis                      | 0             | 0           | 0           |
| Mesothelioma               | 1 (13%)       | 0           | 1 (13%)     |
| Prostate                   | 3 (25%)       | 0           | 0           |
| Sarcoma                    | 0             | 0           | 0           |
| Thymic                     | 0             | 1 (33%)     | 1 (33%)     |

|             |         |         |         |
|-------------|---------|---------|---------|
| Thyroid     | 0       | 1 (20%) | 0       |
| Endometrium | 1 (14%) | 0       | 1 (14%) |
| Vagina      | 0       | 0       | 0 (0%)  |

**Supplementary Table 3. Characteristics of patients who experienced an initial progression**

|                                          | No (%)                              |                                         | P value |
|------------------------------------------|-------------------------------------|-----------------------------------------|---------|
|                                          | Treatment beyond progression n = 81 | No treatment beyond progression n = 122 |         |
| <b>RMH score</b>                         |                                     |                                         | 0.04    |
| 0                                        | 25 (31%)                            | 37 (30%)                                |         |
| 1                                        | 40 (50%)                            | 42 (34%)                                |         |
| 2                                        | 14 (17%)                            | 36 (30%)                                |         |
| 3                                        | 2 (2%)                              | 7 (6%)                                  |         |
| <b>GRIm score</b>                        |                                     |                                         | 0.02    |
| 0                                        | 35 (43%)                            | 45 (37%)                                |         |
| 1                                        | 36 (44%)                            | 43 (35%)                                |         |
| 2                                        | 9 (12%)                             | 25 (21%)                                |         |
| 3                                        | 1 (1%)                              | 8 (7%)                                  |         |
| <b>LIPI score</b>                        |                                     |                                         | 0.008   |
| 0                                        | 39 (48%)                            | 44 (36%)                                |         |
| 1                                        | 38 (47%)                            | 54 (45%)                                |         |
| 2                                        | 4 (5%)                              | 23 (19%)                                |         |
| <b>Reason for progression</b>            |                                     |                                         | 0.17    |
| Target lesions                           | 36 (44%)                            | 46 (38%)                                |         |
| New lesions                              | 20 (25%)                            | 32 (26%)                                |         |
| Non target lesions                       | 7 (9%)                              | 8 (7%)                                  |         |
| Target lesions plus another reason       | 17 (21%)                            | 26 (21%)                                |         |
| Non evaluable                            | 1 (1%)                              | 9 (8%)                                  |         |
| <b>Best overall response beyond iUPD</b> |                                     |                                         |         |
| CR                                       | 2 (2%)                              |                                         |         |
| PR                                       | 6 (8%)                              |                                         |         |
| SD                                       | 8 (10%)                             |                                         |         |
| PD                                       | 65 (80%)                            |                                         |         |

**Supplementary Table 4. Frequency of atypical responses and progression according to iRECIST criteria at first evaluation (in the 12 weeks of drug exposure).**

| iUPD at first imaging              | No (%)           |
|------------------------------------|------------------|
| <b>Atypical responses</b>          | <b>17 (5%)</b>   |
| PsPD                               | 10 (3%)          |
| DisR                               | 7 (2%)           |
| <b>iRECIST-defined progression</b> | <b>203 (56%)</b> |
| iCPD                               | 65 (17%)         |
| iUPD with no imaging further       | 122 (34%)        |
